# Supplementary material for: The Ground-State Calculations for Some Nuclei by Mesonic Potential of Nucleon-Nucleon Interaction
Source: Hindawi journal article supplement (doi:10.1155/2020/3271975), 2020-03-27
Supplement: f1 [file 3271975.f1.docx]

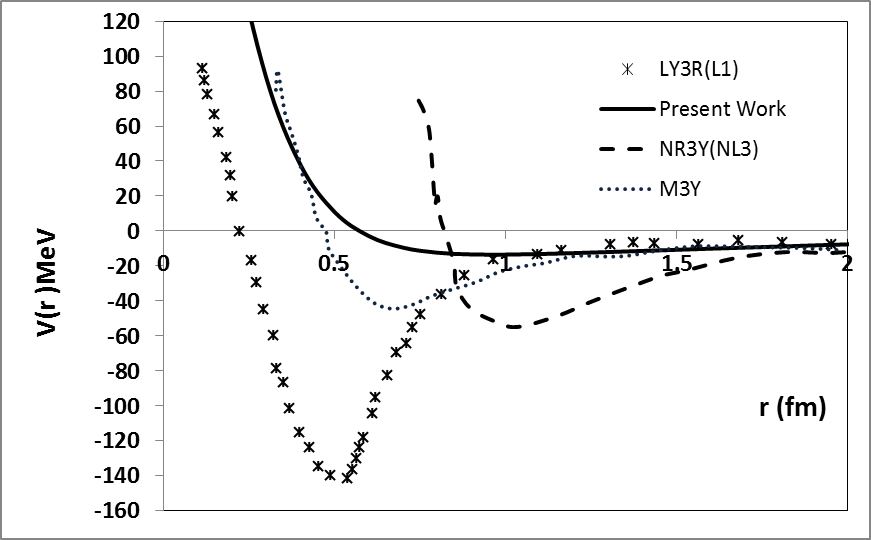


**Deuteron potential for GY function and (set I) parameter**

Ref. B. B. Sahu, S. K. Singh, M. Bhuyan, S. K. Biswal, and S. K. Patra, PHYSICAL REVIEW C **89**, 034614 (2014).


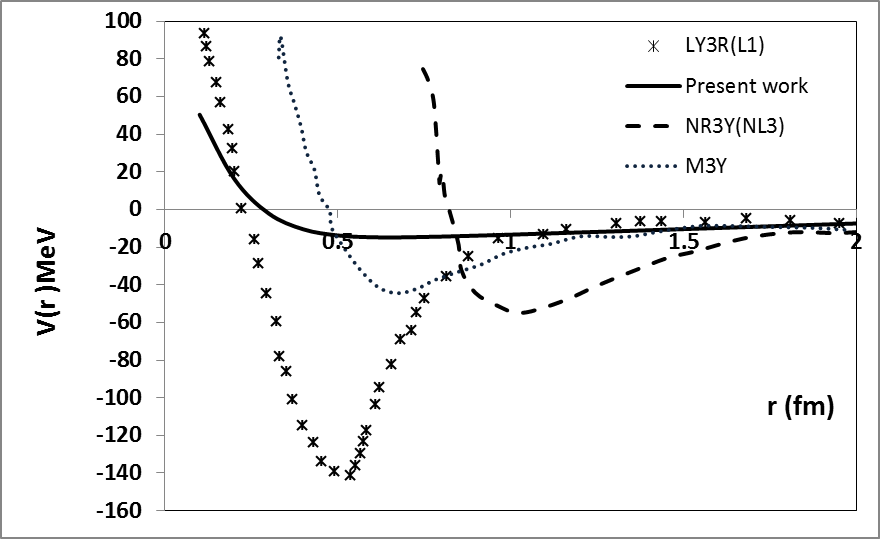


**Deuteron potential for GY function and (set II) parameter**

Ref. B. B. Sahu, S. K. Singh, M. Bhuyan, S. K. Biswal, and S. K. Patra, PHYSICAL REVIEW C **89**, 034614 (2014).


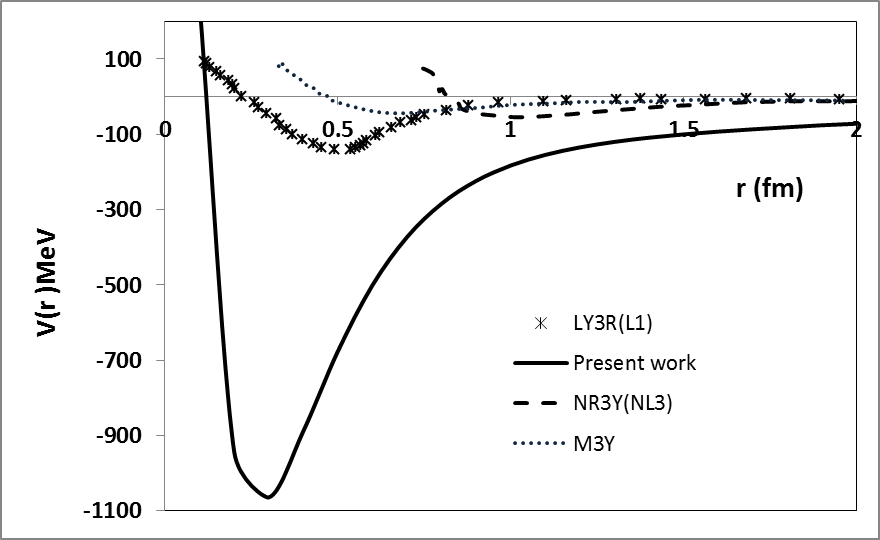


**Deuteron potential for SPED function and (set I) parameter**

Ref. B. B. Sahu, S. K. Singh, M. Bhuyan, S. K. Biswal, and S. K. Patra, PHYSICAL REVIEW C **89**, 034614 (2014).
